# Supplementary material
Source: publisher site journal article supplement (https://www.spandidos-publications.com/4731/downloadSupplementary)

Figure S1. mRNA and protein expression of LIS1 in SACC-LM cells transfected with overexpression plasmid and siRNA. (A) The expression of LIS1 in SACC-LM cells transfected with the control vector (Vector) and the LIS1 expression plasmid (LIS1) was detected by RT-qPCR. (B) The expression of LIS1 in SACC-LM cells transfected with the control siRNA (si-Control) and LIS1 siRNA (si-LIS1 1# and si-LIS1 2#) was detected by RT-qPCR. (C) The protein expression of LIS1 in SACC-LM cells transfected with overexpression plasmid and siRNA was detected by western blotting. (D) Analysis of the protein level of LIS1 in C. (E) The expression of CLIP170 in SACC-LM cells transfected with the control siRNA (si-Control) and CLIP170 siRNA (si-CLIP170 1# and si-CLIP170 2#) was detected by RT-qPCR. (F) The protein expression of CLIP170 in SACC-LM cells transfected with si-CLIP170 was detected by western blotting, and the protein level of CLIP170 was analyzed. Mean  $\pm$  SEM; \*\* $P$ <0.01 and \*\*\* $P$ <0.001. LIS1, lissencephaly 1; SACC, salivary gland adenoid cystic carcinoma; RT-qPCR, reverse transcription quantitative polymerase chain reaction; si-, small interfering RNA; CLIP170, cytoplasmic linker protein 170.

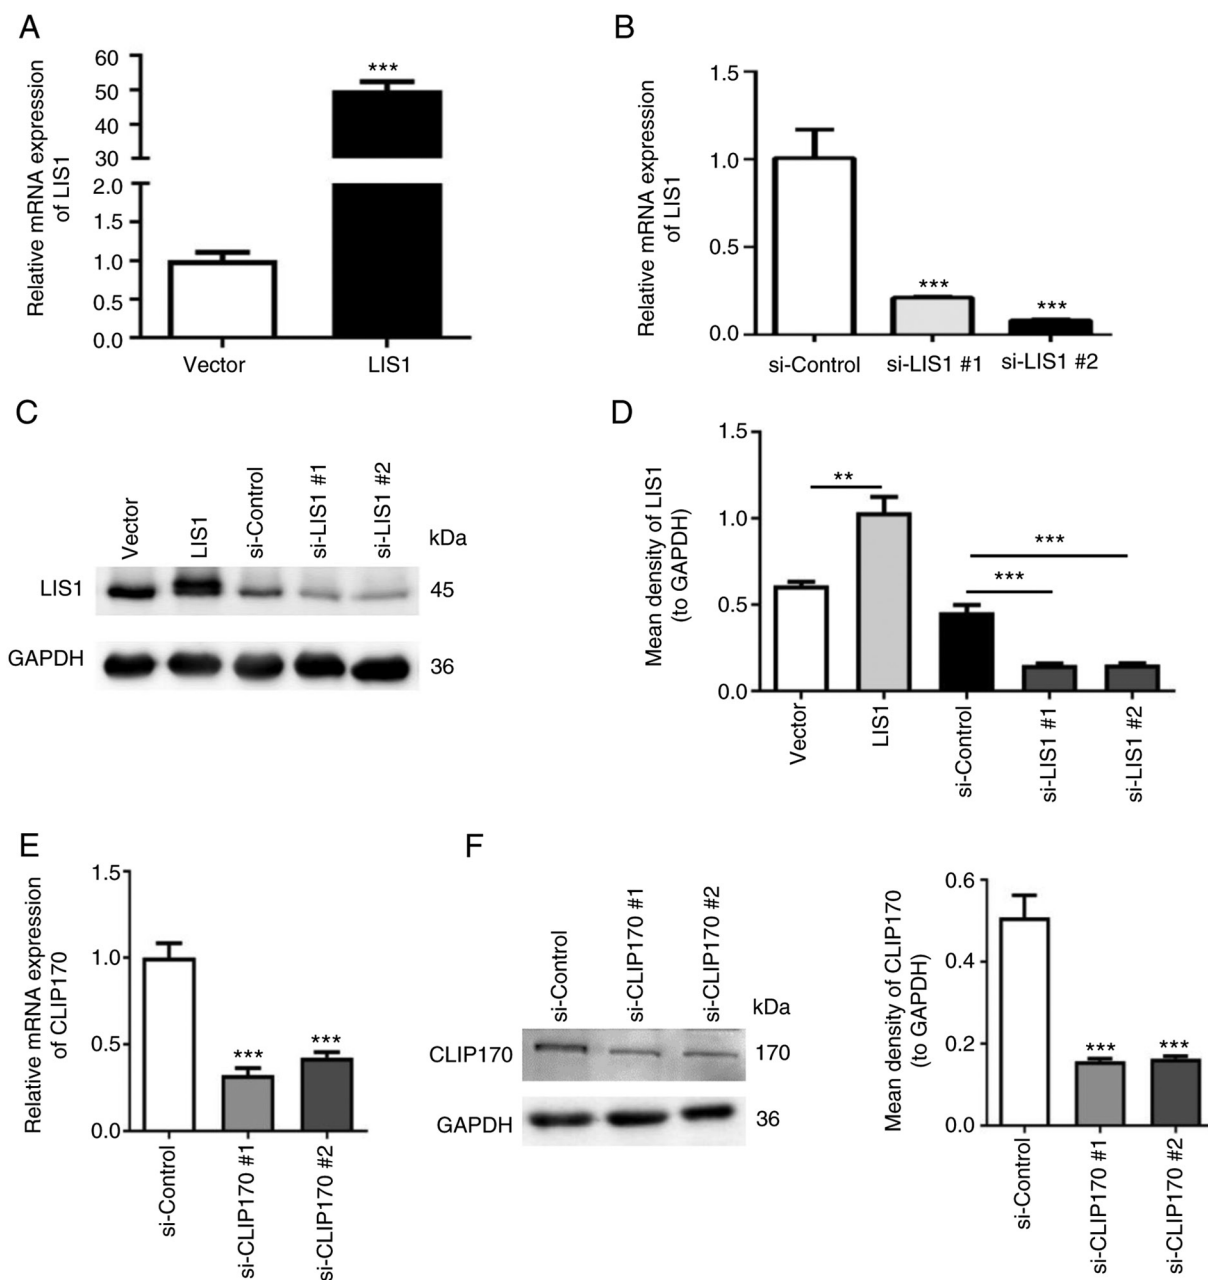

Figure S2. Establishment of the stable LIS1 overexpression and knockdown SACC-LM cell lines. (A) The expression of LIS1 in SACC-LM cells was detected by RT-qPCR. (B) The expression of LIS1 in SACC-LM cells was detected by western blotting. (C) Quantitative analysis of the protein level of LIS1 in B. Mean  $\pm$  SEM; \*\* $P$ <0.01 and \*\*\* $P$ <0.001. LIS1, lissencephaly 1; SACC, salivary gland adenoid cystic carcinoma; RT-qPCR, reverse transcription quantitative polymerase chain reaction; sh-, short hairpin RNA.

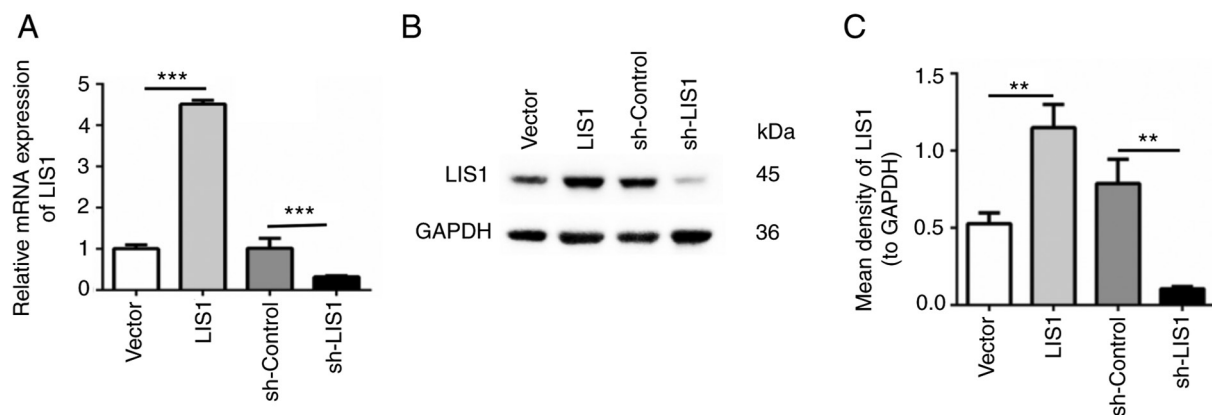

Supplement: Supplementary file 1 [file downloadSupplementary]
